# Supplementary material
Source: publisher figshare collection journal article supplement (https://acs.figshare.com/ndownloader/files/25744229)
Supplement: Supplementary file 1 [file 25744229]

*Supporting Information for*

**Prediction of Oxidant Exposures and Micropollutant  
Abatement during Ozonation Using a Machine Learning  
Method**

Dongwon Cha<sup>†</sup>, Sanghun Park<sup>‡</sup>, Min Sik Kim<sup>†,§</sup>, Taewan Kim<sup>†</sup>, Seok Won Hong<sup>||</sup>,

Kyung Hwa Cho<sup>‡,\*</sup>, Changha Lee<sup>†,\*</sup>

<sup>†</sup>*School of Chemical and Biological Engineering, Institute of Chemical Process (ICP), Seoul National University, 1 Gwanak-ro, Gwanak-gu, Seoul 08826, Republic of Korea*

<sup>‡</sup>*School of Urban and Environmental Engineering, Ulsan National Institute of Science and Technology (UNIST), 50 UNIST-gil, Ulju-gun, Ulsan 44919, Republic of Korea*

<sup>§</sup>*Department of Chemical and Environmental Engineering, Yale University, New Haven, CT 06520, United States*

<sup>||</sup> *Water Cycle Research Center, Korea Institute of Science and Technology (KIST), Hwarangro 14 Gil 5, Seongbuk-gu, Seoul, 02792, Republic of Korea*

\*Corresponding authors

Tel.: +82-52-217-2829 (K.H. Cho); +82-2-880-8630 (C. Lee)

Fax: +82-52-217-2819 (K.H. Cho); +82-2-888-7295 (C. Lee)

E-mail: [khcho@unist.ac.kr](mailto:khcho@unist.ac.kr) (K.H. Cho); [leechangha@snu.ac.kr](mailto:leechangha@snu.ac.kr) (C. Lee)

**The supporting information contains 28 pages, 9 tables, and 18 figures.**

## Text S1. Additional details, hyperparameters, and development procedure of the RF model

The RF model was developed using the following hyperparameters after considering the number of data (42 training sets). The minimum parent size was 10 (left as default) and the minimum leaf size was designed as 1 due to the small data set. Additionally, the maximum number of branches (depth) was set to 5 to prevent over-fitting problems driven by the minimum leaf size. Bootstrap aggregating (i.e., bagging) ensemble method was used to improve the stability and accuracy of the model. The number of ensemble learning cycles (i.e., number of trees for ensemble) was set to 100.

The procedure for the development of the RF model is as follows:

- The training and validation data sets were randomly divided into sets of 42 and 18, respectively.
- The training set was resampled with replacements, thus different training data sets were permuted (i.e., bootstrapping). The bootstrapping method can substitute a cross-validation process by producing independent datasets through sampling with replacement. Each bootstrap set was used to train a decision tree model, then 100 tree models were prepared for ensemble modeling.
- Ensemble modeling aggregated the prediction of each tree model and resulted in a final prediction achieving a reduced variance.

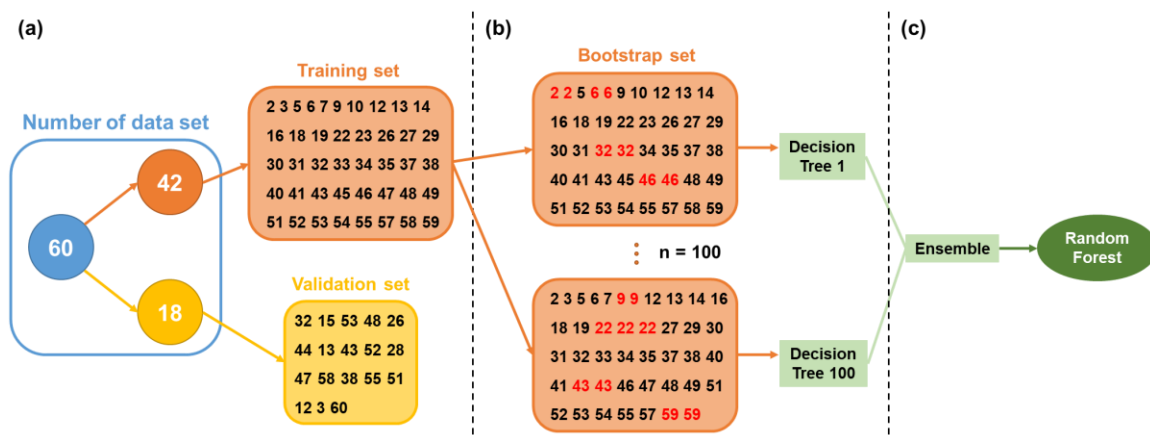

## **Text S2. Comparison of RF and ridge regression models**

Two ridge regression models were developed to compare the prediction performance with the RF models (FEEM-Free and FEEM-HighRes) and to evaluate the influence of FEEM features on model performance. The same training and validation data that were used to develop the RF model were also used during the development of the ridge model.

In the case of O<sub>3</sub> exposure prediction, RF-FEEM-Free model shows relatively uniform correlation in training (0.784) and validation (0.732). On the other hand, while Ridge-FEEM-Free model showed a higher correlation in validation (0.836), training fared the worst among FEEM-free models (0.683), with a distinct tendency to underestimate higher O<sub>3</sub> exposure points. For the RF model, the prediction accuracy was increased (from 0.732 to 0.797 in validation) when the FEEM features were included as the input parameters. However, the usage of multiple parameters (i.e., FEEM data) decreased the prediction accuracy (from 0.836 to 0.691 in validation) for the ridge regression model (refer to Figure S14 of the SI)

In the case of •OH exposure prediction, RF-FEEM-Free and RF-FEEM-HighRes models demonstrated a superiority in prediction compared to the ridge regression models regardless of the input parameters (refer to Figure S15 of the SI).

### **Text S3. Variable importance for FEEM-Free and FEEM-HighRes models**

Additionally, variable importance (VI) scores for the FEEM-free model (using only water characteristics) and FEEM-HighRes model were determined. In the case of FEEM-Free model, DOC was the most significant variable for the prediction of  $O_3$  and  $\bullet OH$  exposure, while Region 5 of the FEEM contour plot showed the highest importance score when the model included FEEM features (i.e., FEEM-HighRes). As VI scores represent the statistical significance and the contribution of each input parameters with respect to model output, the use of FEEM features and its formidable VI values may result in the increase in prediction accuracy (refer to Figure S17).

**Table S1.** HPLC analytical conditions for *p*CBA and MPs used in this study

| Compound      | Flow rate<br>(mL/min) | Eluent composition                               | UV detection<br>(nm) | Retention<br>time (min) |
|---------------|-----------------------|--------------------------------------------------|----------------------|-------------------------|
| <i>p</i> CBA  | 0.8                   | 40 % 0.1 % phosphoric acid,<br>60 % acetonitrile | 234                  | 1.8                     |
| Atrazine      |                       | 50 % 0.1 % phosphoric acid,<br>50 % acetonitrile | 220                  | 1.5                     |
| Caffeine      |                       | 85 % 0.1 % phosphoric acid,<br>15 % acetonitrile | 270                  | 1.2                     |
| Carbamazepine |                       | 40 % 0.1% phosphoric acid,<br>60 % acetonitrile  | 285                  | 1.4                     |
| Ibuprofen     |                       | 40 % 0.1% phosphoric acid,<br>60 % acetonitrile  | 215                  | 1.9                     |

**Table S2.** Oxidant exposures measured for natural waters ( $[O_3]_0 = 2.5$  mg/L).

| Source                       | #  | Location     | $O_3$ exposure (M s)  | $\bullet OH$ exposure (M s) |
|------------------------------|----|--------------|-----------------------|-----------------------------|
| Nakdong River                | 1  | Uiseong      | $3.75 \times 10^{-3}$ | $3.48 \times 10^{-10}$      |
|                              | 2  | Gumi         | $2.49 \times 10^{-3}$ | $4.69 \times 10^{-10}$      |
|                              | 3  | Maegok       | $2.67 \times 10^{-3}$ | $3.19 \times 10^{-10}$      |
|                              | 4  | Guji         | $2.63 \times 10^{-3}$ | $3.04 \times 10^{-10}$      |
|                              | 5  | Namji        | $2.58 \times 10^{-3}$ | $3.87 \times 10^{-10}$      |
|                              | 6  | Hanam        | $1.86 \times 10^{-3}$ | $3.85 \times 10^{-10}$      |
|                              | 7  | Yangsan      | $2.29 \times 10^{-3}$ | $3.60 \times 10^{-10}$      |
| Han River                    | 8  | Chungju      | $8.91 \times 10^{-3}$ | $5.70 \times 10^{-10}$      |
|                              | 9  | Yeoju        | $6.41 \times 10^{-3}$ | $6.80 \times 10^{-10}$      |
|                              | 10 | Cheongpyeong | $1.19 \times 10^{-2}$ | $4.41 \times 10^{-10}$      |
|                              | 11 | Gwangnaru    | $7.33 \times 10^{-3}$ | $5.34 \times 10^{-10}$      |
|                              | 12 | Yangwha      | $4.83 \times 10^{-3}$ | $4.05 \times 10^{-10}$      |
| Geum River                   | 13 | Gapcheon     | $8.51 \times 10^{-3}$ | $4.35 \times 10^{-10}$      |
|                              | 14 | Daecheong    | $4.63 \times 10^{-3}$ | $4.52 \times 10^{-10}$      |
|                              | 15 | Gongju       | $6.16 \times 10^{-4}$ | $2.46 \times 10^{-10}$      |
|                              | 16 | Buyeo        | $7.29 \times 10^{-4}$ | $3.08 \times 10^{-10}$      |
|                              | 17 | Seocheon     | $4.04 \times 10^{-3}$ | $3.81 \times 10^{-10}$      |
| Yeongsan River               | 18 | Damyang      | $2.67 \times 10^{-3}$ | $2.87 \times 10^{-10}$      |
|                              | 19 | Gwangju      | $3.16 \times 10^{-3}$ | $3.03 \times 10^{-10}$      |
|                              | 20 | Yeongam      | $5.10 \times 10^{-3}$ | $2.22 \times 10^{-10}$      |
| Seomjin River                | 21 | Sunchang     | $5.71 \times 10^{-3}$ | $2.00 \times 10^{-10}$      |
|                              | 22 | Agyang       | $7.77 \times 10^{-3}$ | $3.03 \times 10^{-10}$      |
|                              | 23 | Hadong       | $1.09 \times 10^{-2}$ | $1.36 \times 10^{-10}$      |
| Tributaries of the Han River | 24 | Yangjae      | $1.55 \times 10^{-2}$ | $5.11 \times 10^{-10}$      |
|                              | 25 | Tan          | $1.17 \times 10^{-3}$ | $1.82 \times 10^{-10}$      |
|                              | 26 | Jungnang     | $1.92 \times 10^{-3}$ | $2.38 \times 10^{-10}$      |
|                              | 27 | Cheonggye    | $1.07 \times 10^{-2}$ | $5.31 \times 10^{-10}$      |
|                              | 28 | Changreung   | $8.99 \times 10^{-3}$ | $5.60 \times 10^{-10}$      |
|                              | 29 | Anyang       | $5.36 \times 10^{-4}$ | $1.45 \times 10^{-10}$      |
|                              | 30 | Dorim        | $1.35 \times 10^{-2}$ | $6.25 \times 10^{-10}$      |

**Table S3.** Oxidant exposures measured for wastewater effluents ( $[\text{O}_3]_0 = 2.5 \text{ mg/L}$ ).

| Region              | #  | Description               | $\text{O}_3$ exposure (M s) | $\bullet\text{OH}$ exposure (M s) |
|---------------------|----|---------------------------|-----------------------------|-----------------------------------|
| Seoul /<br>Gyeonggi | 1  | S city, E treatment plant | $6.55 \times 10^{-4}$       | $1.96 \times 10^{-10}$            |
|                     | 2  | S city, T treatment plant | $6.15 \times 10^{-4}$       | $1.56 \times 10^{-10}$            |
|                     | 3  | S city, S treatment plant | $4.69 \times 10^{-4}$       | $1.59 \times 10^{-10}$            |
|                     | 4  | B city, G treatment plant | $1.76 \times 10^{-3}$       | $2.45 \times 10^{-10}$            |
|                     | 5  | B city, Y treatment plant | $7.02 \times 10^{-4}$       | $1.49 \times 10^{-10}$            |
|                     | 6  | P city, P treatment plant | $9.25 \times 10^{-4}$       | $9.68 \times 10^{-11}$            |
|                     | 7  | D city, D treatment plant | $1.26 \times 10^{-3}$       | $2.15 \times 10^{-10}$            |
|                     | 8  | U city, B treatment plant | $1.91 \times 10^{-3}$       | $2.60 \times 10^{-10}$            |
| South Jeolla        | 9  | Y city                    | $9.12 \times 10^{-3}$       | $4.81 \times 10^{-10}$            |
| Gangwon             | 10 | Y county                  | $5.02 \times 10^{-3}$       | $3.44 \times 10^{-10}$            |
|                     | 11 | Gangwon 1                 | $5.70 \times 10^{-4}$       | $1.31 \times 10^{-10}$            |
|                     | 12 | Gangwon 2                 | $2.57 \times 10^{-3}$       | $2.51 \times 10^{-10}$            |
|                     | 13 | Gangwon 3                 | $1.27 \times 10^{-3}$       | $2.49 \times 10^{-10}$            |
|                     | 14 | Gangwon 4                 | $8.52 \times 10^{-3}$       | $3.47 \times 10^{-10}$            |
|                     | 15 | Gangwon 5                 | $4.49 \times 10^{-4}$       | $1.13 \times 10^{-10}$            |
|                     | 16 | Gangwon 6                 | $8.74 \times 10^{-4}$       | $1.36 \times 10^{-10}$            |
|                     | 17 | Gangwon 7                 | $4.02 \times 10^{-3}$       | $2.87 \times 10^{-10}$            |
|                     | 18 | Gangwon 8                 | $2.69 \times 10^{-3}$       | $2.18 \times 10^{-10}$            |
|                     | 19 | Gangwon 9                 | $2.41 \times 10^{-3}$       | $2.09 \times 10^{-10}$            |
|                     | 20 | Gangwon 10                | $3.51 \times 10^{-3}$       | $2.91 \times 10^{-10}$            |
|                     | 21 | Gangwon 11                | $3.46 \times 10^{-3}$       | $2.93 \times 10^{-10}$            |
|                     | 22 | Gangwon 12                | $1.58 \times 10^{-3}$       | $2.58 \times 10^{-10}$            |
|                     | 23 | Gangwon 13                | $9.91 \times 10^{-3}$       | $6.40 \times 10^{-10}$            |
|                     | 24 | Gangwon 14                | $1.51 \times 10^{-3}$       | $2.11 \times 10^{-10}$            |
|                     | 25 | Gangwon 15                | $1.31 \times 10^{-3}$       | $1.60 \times 10^{-10}$            |
|                     | 26 | Gangwon 16                | $3.20 \times 10^{-3}$       | $1.79 \times 10^{-10}$            |
|                     | 27 | Gangwon 17                | $6.06 \times 10^{-3}$       | $2.19 \times 10^{-10}$            |
|                     | 28 | Gangwon 18                | $1.41 \times 10^{-3}$       | $2.14 \times 10^{-10}$            |
|                     | 29 | Gangwon 19                | $1.56 \times 10^{-2}$       | $3.51 \times 10^{-10}$            |
|                     | 30 | Gangwon 20                | $7.87 \times 10^{-4}$       | $9.38 \times 10^{-11}$            |

**Table S4.** Water quality parameters (pH, DOC concentration, and alkalinity) for natural waters.

| Source                             | Location     | pH   | DOC<br>concentration<br>(mg/L) | Alkalinity<br>(mg/L as CaCO <sub>3</sub> ) |
|------------------------------------|--------------|------|--------------------------------|--------------------------------------------|
| Nakdong<br>River                   | Uiseong      | 8.07 | 4.58                           | 70                                         |
|                                    | Gumi         | 8.94 | 3.40                           | 70                                         |
|                                    | Maegok       | 7.80 | 3.84                           | 40                                         |
|                                    | Guji         | 8.02 | 4.77                           | 55                                         |
|                                    | Namji        | 7.90 | 3.99                           | 50                                         |
|                                    | Hanam        | 8.16 | 4.59                           | 50                                         |
|                                    | Yangsan      | 7.97 | 4.45                           | 40                                         |
| Han River                          | Chungju      | 8.13 | 2.21                           | 75                                         |
|                                    | Yeoju        | 8.20 | 2.85                           | 75                                         |
|                                    | Cheongpyeong | 7.62 | 1.95                           | 35                                         |
|                                    | Gwangnaru    | 8.31 | 2.35                           | 50                                         |
|                                    | Yangwha      | 8.11 | 2.80                           | 50                                         |
| Geum River                         | Gapcheon     | 8.02 | 2.33                           | 75                                         |
|                                    | Daecheong    | 7.87 | 3.09                           | 35                                         |
|                                    | Gongju       | 9.26 | 3.89                           | 75                                         |
|                                    | Buyeo        | 9.08 | 3.61                           | 75                                         |
|                                    | Seocheon     | 8.20 | 3.56                           | 55                                         |
| Yeongsan<br>River                  | Damyang      | 7.55 | 4.78                           | 45                                         |
|                                    | Gwangju      | 7.72 | 4.46                           | 50                                         |
|                                    | Yeongam      | 8.05 | 3.73                           | 60                                         |
| Seomjin<br>River                   | Sunchang     | 7.55 | 4.20                           | 25                                         |
|                                    | Agyang       | 7.69 | 2.68                           | 30                                         |
|                                    | Hadong       | 7.66 | 2.72                           | 30                                         |
| Tributaries of<br>the Han<br>River | Yangjae      | 8.09 | 1.49                           | 70                                         |
|                                    | Tan          | 7.89 | 4.19                           | 90                                         |
|                                    | Jungnang     | 7.89 | 3.40                           | 65                                         |
|                                    | Cheonggye    | 8.00 | 1.66                           | 55                                         |
|                                    | Changreung   | 7.81 | 1.88                           | 50                                         |
|                                    | Anyang       | 7.90 | 4.63                           | 80                                         |
|                                    | Dorim        | 7.93 | 1.74                           | 45                                         |



**Table S5.** Water quality parameters (pH, DOC concentration, and alkalinity) for wastewater effluents.

| Region              | Description               | pH   | DOC<br>concentration<br>mg/L | Alkalinity<br>(mg/L as CaCO <sub>3</sub> ) |
|---------------------|---------------------------|------|------------------------------|--------------------------------------------|
| Seoul /<br>Gyeonggi | S city, E treatment plant | 7.93 | 5.27                         | 70                                         |
|                     | S city, T treatment plant | 7.02 | 6.01                         | 60                                         |
|                     | S city, S treatment plant | 7.71 | 5.48                         | 85                                         |
|                     | B city, G treatment plant | 7.26 | 4.29                         | 40                                         |
|                     | B city, Y treatment plant | 7.17 | 4.99                         | 50                                         |
|                     | P city, P treatment plant | 7.97 | 5.21                         | 210                                        |
|                     | D city, D treatment plant | 7.58 | 5.07                         | 70                                         |
|                     | U city, B treatment plant | 7.51 | 4.00                         | 40                                         |
| South Jeolla        | Y city                    | 7.76 | 2.78                         | 40                                         |
| Gangwon             | Y county                  | 7.32 | 4.02                         | 40                                         |
|                     | Gangwon 1                 | 7.62 | 5.81                         | 75                                         |
|                     | Gangwon 2                 | 6.12 | 3.52                         | 10                                         |
|                     | Gangwon 3                 | 7.12 | 3.79                         | 30                                         |
|                     | Gangwon 4                 | 6.73 | 3.45                         | 10                                         |
|                     | Gangwon 5                 | 6.62 | 4.66                         | 10                                         |
|                     | Gangwon 6                 | 7.32 | 6.06                         | 125                                        |
|                     | Gangwon 7                 | 7.20 | 3.88                         | 35                                         |
|                     | Gangwon 8                 | 7.14 | 6.20                         | 50                                         |
|                     | Gangwon 9                 | 6.99 | 5.07                         | 30                                         |
|                     | Gangwon 10                | 6.80 | 4.32                         | 15                                         |
|                     | Gangwon 11                | 6.81 | 4.25                         | 15                                         |
|                     | Gangwon 12                | 7.11 | 3.95                         | 30                                         |
|                     | Gangwon 13                | 7.20 | 2.26                         | 20                                         |
|                     | Gangwon 14                | 6.84 | 4.39                         | 15                                         |
|                     | Gangwon 15                | 7.13 | 4.83                         | 50                                         |
|                     | Gangwon 16                | 7.25 | 5.63                         | 50                                         |
|                     | Gangwon 17                | 7.43 | 3.42                         | 35                                         |
|                     | Gangwon 18                | 7.09 | 3.67                         | 25                                         |
|                     | Gangwon 19                | 6.24 | 3.60                         | 5                                          |
|                     | Gangwon 20                | 7.16 | 5.01                         | 30                                         |

**Table S6.** Percent fluorescence response ( $P_{(i,n)}$ ) values calculated by FRI of the five regions in the FEEM contour plot (for the FEEM-LowRes model) for natural waters.

| Source                       | Location     | $P_{(1,n)}$ | $P_{(2,n)}$ | $P_{(3,n)}$ | $P_{(4,n)}$ | $P_{(5,n)}$ |
|------------------------------|--------------|-------------|-------------|-------------|-------------|-------------|
| Nakdong River                | Uiseong      | 1.707       | 9.152       | 47.536      | 7.080       | 34.526      |
|                              | Gumi         | 1.582       | 10.162      | 46.710      | 8.372       | 33.174      |
|                              | Maegok       | 2.005       | 8.950       | 47.277      | 6.774       | 34.993      |
|                              | Guji         | 4.990       | 19.487      | 34.973      | 15.659      | 24.890      |
|                              | Namji        | 4.690       | 17.555      | 37.518      | 13.657      | 26.581      |
|                              | Hanam        | 4.470       | 17.130      | 38.349      | 12.685      | 27.365      |
|                              | Yangsan      | 3.779       | 13.955      | 41.833      | 10.510      | 29.924      |
| Han River                    | Chungju      | 3.301       | 11.433      | 44.241      | 8.478       | 32.547      |
|                              | Yeoju        | 3.412       | 11.796      | 44.189      | 8.874       | 31.730      |
|                              | Cheongpyeong | 4.672       | 12.240      | 44.199      | 8.902       | 29.987      |
|                              | Gwangnaru    | 4.571       | 13.862      | 42.212      | 9.839       | 29.516      |
|                              | Yangwha      | 4.406       | 15.641      | 37.261      | 13.531      | 29.161      |
| Geum River                   | Gapcheon     | 6.027       | 15.955      | 41.475      | 10.340      | 26.204      |
|                              | Daecheong    | 3.376       | 10.963      | 47.460      | 7.066       | 31.135      |
|                              | Gongju       | 4.253       | 17.127      | 38.176      | 12.630      | 27.815      |
|                              | Buyeo        | 4.692       | 17.604      | 38.700      | 12.413      | 26.591      |
|                              | Seocheon     | 4.430       | 14.136      | 43.791      | 9.262       | 28.381      |
| Yeongsan River               | Damyang      | 2.589       | 11.210      | 43.627      | 9.063       | 33.512      |
|                              | Gwangju      | 3.315       | 12.485      | 42.694      | 10.034      | 31.473      |
|                              | Yeongam      | 4.128       | 15.405      | 39.148      | 12.675      | 28.644      |
| Seomjin River                | Sunchang     | 2.087       | 9.121       | 44.983      | 8.422       | 35.387      |
|                              | Agyang       | 3.808       | 11.844      | 43.806      | 9.077       | 31.465      |
|                              | Hadong       | 4.603       | 12.200      | 42.811      | 9.013       | 31.373      |
| Tributaries of the Han River | Yangjae      | 6.734       | 15.404      | 36.813      | 11.877      | 29.172      |
|                              | Tan          | 5.605       | 17.953      | 33.751      | 15.686      | 27.005      |
|                              | Jungnang     | 5.053       | 16.446      | 33.902      | 16.133      | 28.467      |
|                              | Cheonggye    | 7.335       | 16.544      | 37.389      | 11.833      | 26.899      |
|                              | Changreung   | 6.989       | 17.318      | 36.207      | 12.510      | 26.976      |
|                              | Anyang       | 5.546       | 18.401      | 33.874      | 15.811      | 26.367      |
|                              | Dorim        | 7.431       | 17.594      | 37.420      | 11.789      | 25.767      |

**Table S7.** Percent fluorescence response ( $P_{(i,n)}$ ) values calculated by FRI of the five regions in the FEEM contour plot (for the FEEM-LowRes model) for wastewater effluents.

| Region              | Description               | $P_{(1,n)}$ | $P_{(2,n)}$ | $P_{(3,n)}$ | $P_{(4,n)}$ | $P_{(5,n)}$ |
|---------------------|---------------------------|-------------|-------------|-------------|-------------|-------------|
| Seoul /<br>Gyeonggi | S city, E treatment plant | 6.230       | 19.496      | 37.373      | 12.756      | 24.145      |
|                     | S city, T treatment plant | 3.179       | 11.402      | 32.423      | 16.491      | 36.506      |
|                     | S city, S treatment plant | 4.916       | 14.971      | 36.536      | 12.993      | 30.585      |
|                     | B city, G treatment plant | 2.930       | 13.985      | 34.089      | 15.683      | 33.313      |
|                     | B city, Y treatment plant | 2.951       | 14.305      | 32.952      | 16.485      | 33.307      |
|                     | P city, P treatment plant | 9.794       | 14.168      | 32.760      | 13.658      | 29.621      |
|                     | D city, D treatment plant | 3.551       | 15.524      | 35.423      | 13.760      | 31.742      |
|                     | U city, B treatment plant | 3.012       | 14.880      | 35.699      | 14.316      | 32.093      |
| South Jeolla        | Y city                    | 3.367       | 15.233      | 33.554      | 16.806      | 31.040      |
| Gangwon             | Y county                  | 4.017       | 18.724      | 34.174      | 16.256      | 26.829      |
|                     | Gangwon 1                 | 7.754       | 22.274      | 35.152      | 12.172      | 22.648      |
|                     | Gangwon 2                 | 1.838       | 11.370      | 32.550      | 15.705      | 38.538      |
|                     | Gangwon 3                 | 4.117       | 18.881      | 35.318      | 14.330      | 27.354      |
|                     | Gangwon 4                 | 5.110       | 16.966      | 35.677      | 14.974      | 27.273      |
|                     | Gangwon 5                 | 1.637       | 9.618       | 33.454      | 14.686      | 40.605      |
|                     | Gangwon 6                 | 3.015       | 14.665      | 37.001      | 12.948      | 32.371      |
|                     | Gangwon 7                 | 5.950       | 20.737      | 34.737      | 14.559      | 24.017      |
|                     | Gangwon 8                 | 10.669      | 22.294      | 32.667      | 13.631      | 20.739      |
|                     | Gangwon 9                 | 3.841       | 14.460      | 32.966      | 17.045      | 31.688      |
|                     | Gangwon 10                | 5.210       | 18.097      | 34.891      | 15.171      | 26.631      |
|                     | Gangwon 11                | 4.824       | 17.142      | 34.525      | 15.727      | 27.782      |
|                     | Gangwon 12                | 5.734       | 20.129      | 34.455      | 14.904      | 24.778      |
|                     | Gangwon 13                | 2.523       | 12.286      | 34.683      | 14.047      | 36.461      |
|                     | Gangwon 14                | 4.790       | 17.406      | 34.535      | 15.644      | 27.625      |
|                     | Gangwon 15                | 3.988       | 18.278      | 30.890      | 19.604      | 27.240      |
|                     | Gangwon 16                | 9.961       | 22.493      | 31.847      | 14.478      | 21.222      |
|                     | Gangwon 17                | 4.839       | 19.140      | 33.242      | 16.402      | 26.378      |
|                     | Gangwon 18                | 5.381       | 19.882      | 34.158      | 15.319      | 25.261      |
|                     | Gangwon 19                | 2.522       | 9.736       | 47.172      | 9.209       | 31.361      |
|                     | Gangwon 20                | 3.214       | 14.167      | 33.919      | 16.409      | 32.291      |

**Table S8.** RSS and AIC for the prediction of O<sub>3</sub> and •OH exposures.

| Type         | K*               | O <sub>3</sub> exposure |          | •OH exposure          |          |
|--------------|------------------|-------------------------|----------|-----------------------|----------|
|              |                  | RSS                     | AIC      | RSS                   | AIC      |
| FEEM-Free    | 3                | $5.4 \times 10^{-5}$    | -141.6   | $5.4 \times 10^{-20}$ | -556.2   |
| FEEM-LowRes  | 8<br>(5)         | $4.6 \times 10^{-5}$    | -132.0   | $4.5 \times 10^{-20}$ | -548.4   |
| FEEM-HighRes | 86<br>(83)       | $4.2 \times 10^{-5}$    | 21.1     | $3.6 \times 10^{-20}$ | -394.9   |
| FEEM-FullRes | 9,727<br>(9,724) | $3.1 \times 10^{-5}$    | 19,299.6 | $3.7 \times 10^{-20}$ | 18,887.2 |

\* K = the number of input variables (the values in parentheses are the number of FEEM variables)

**Table S9.** Second-order rate constants for the reactions of O<sub>3</sub> and •OH with MPs used in this study.

| MP            | k <sub>O3</sub> (M <sup>-1</sup> s <sup>-1</sup> ) | k <sub>•OH</sub> (M <sup>-1</sup> s <sup>-1</sup> ) | Reference |
|---------------|----------------------------------------------------|-----------------------------------------------------|-----------|
| Atrazine      | 4.0                                                | $2.7 \times 10^9$                                   | S1        |
| Ibuprofen     | 9.6                                                | $7.4 \times 10^9$                                   | S2        |
| Caffeine      | $6.5 \times 10^2$                                  | $5.9 \times 10^9$                                   | S3        |
| Carbamazepine | $3.0 \times 10^5$                                  | $8.8 \times 10^9$                                   | S2        |

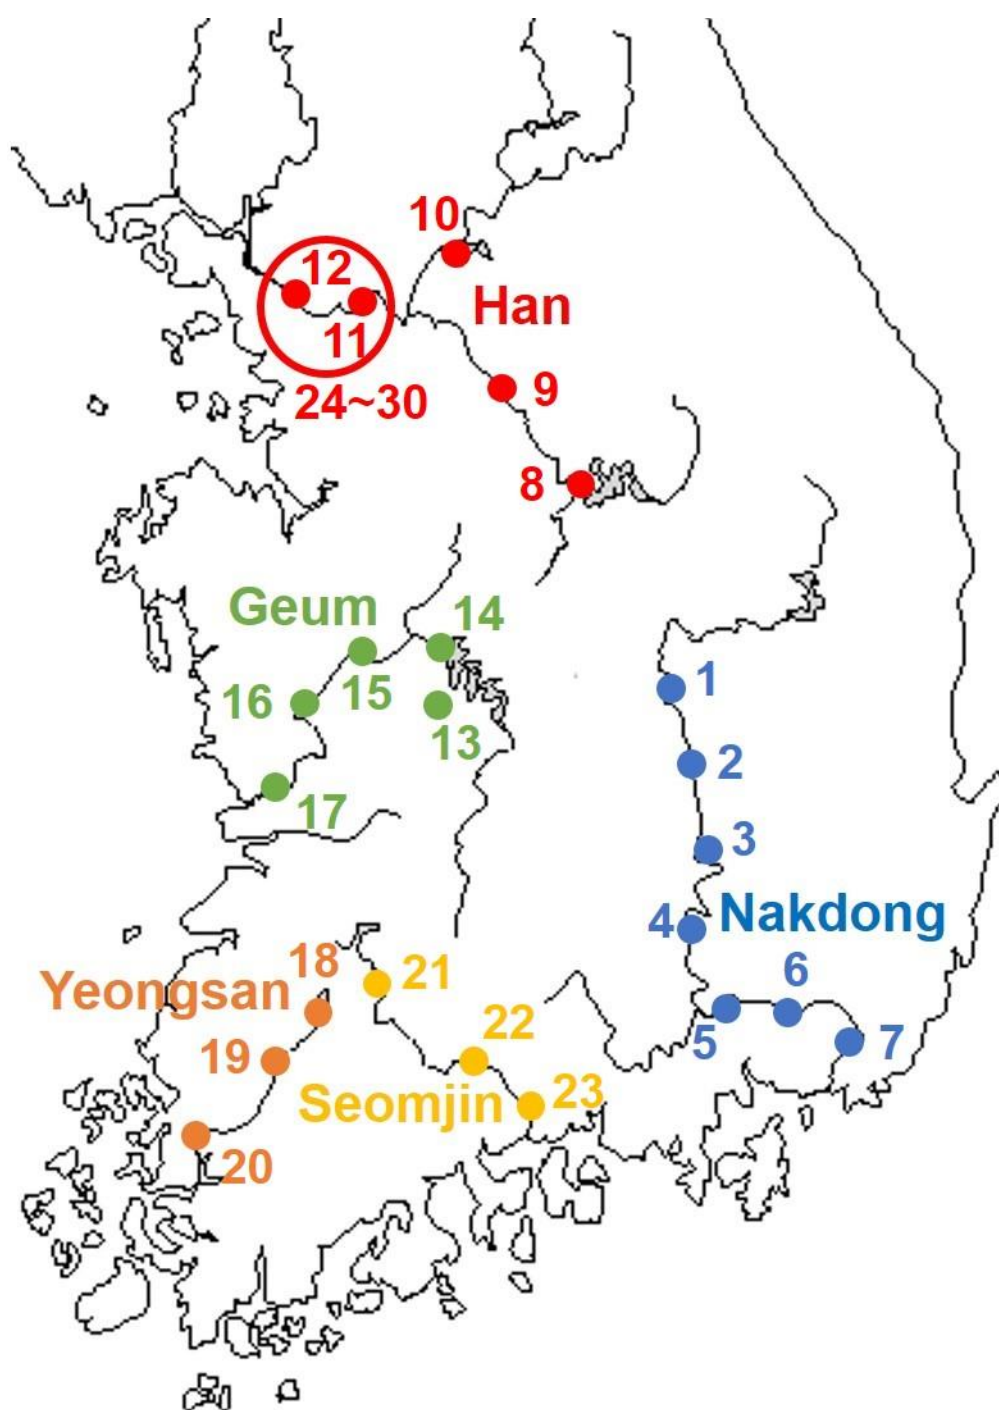

**Figure S1.** Sampling locations of natural waters across the four major rivers in South Korea. Note that samples for tributaries of the Han River were taken in the red circled region. Refer to Table S2 for the numbers of natural water sampling locations.

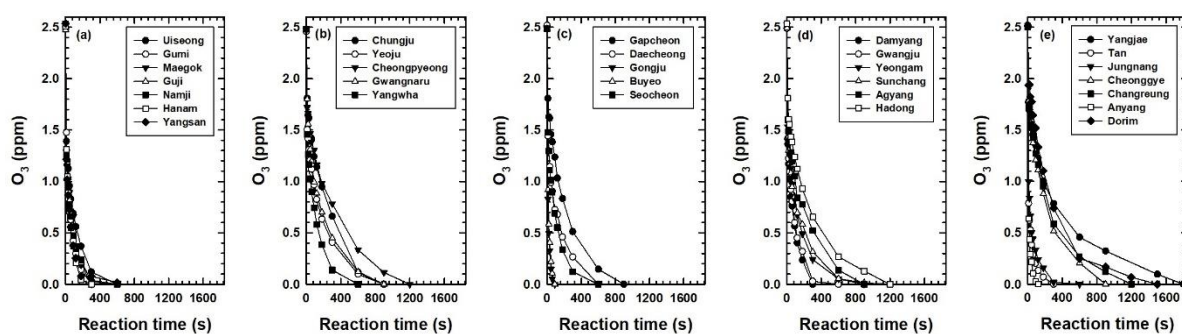

**Figure S2.** Time–concentration profiles of  $O_3$  during the ozonation of natural waters, (a) Nakdong [1–7], (b) Han [8–9], (c) Geum [13–17], (d) Yeongsan and Sumjin Rivers [18–23], and (e) tributaries of the Han River [24–30]. Numbering in brackets corresponds to sampling locations as designated in Table S2.

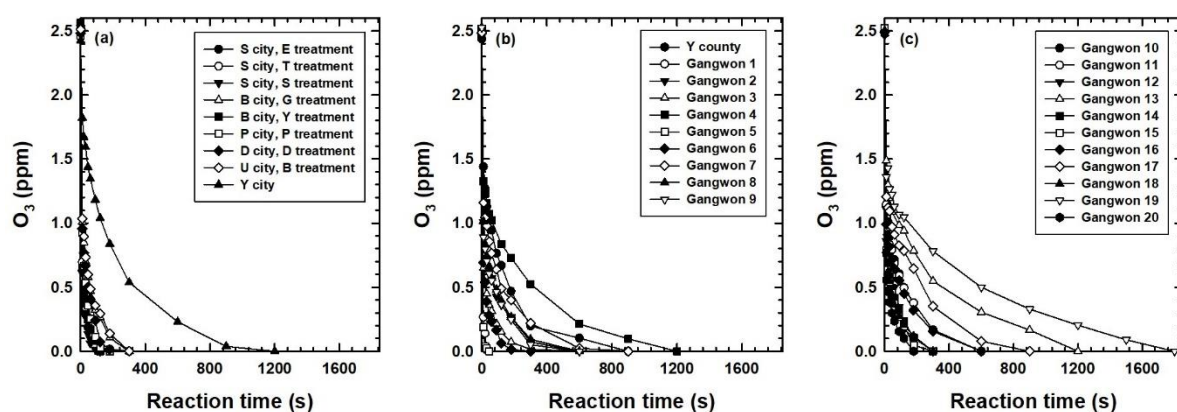

**Figure S3.** Time–concentration profiles of  $O_3$  during the ozonation of wastewater effluents from WWTPs in (a) Seoul, and Gyeonggi and South Jeolla provinces [1–9], and (b, c) Gangwon province [10–30]. Numbering in brackets corresponds to sampling locations as designated in Table S3.

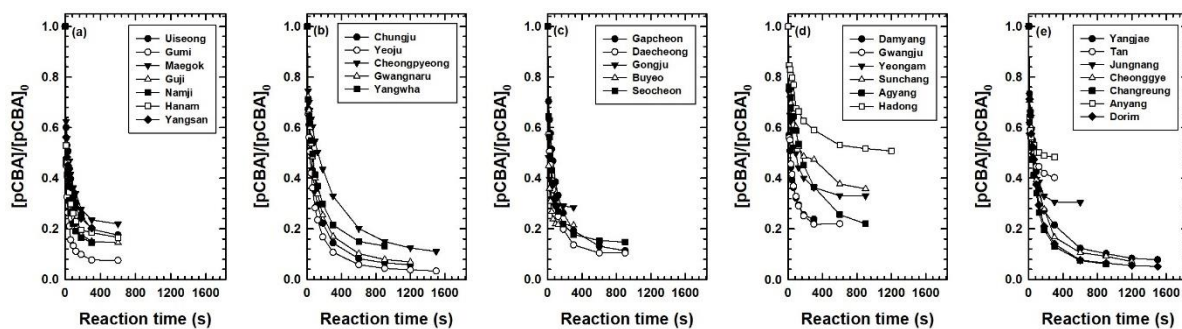

**Figure S4.** Time–concentration profiles of *p*CBA during the ozonation of natural waters, (a) Nakdong, (b) Han, (c) Geum, (d) Yeongsan and Sumjin Rivers, and (e) tributaries of the Han River.

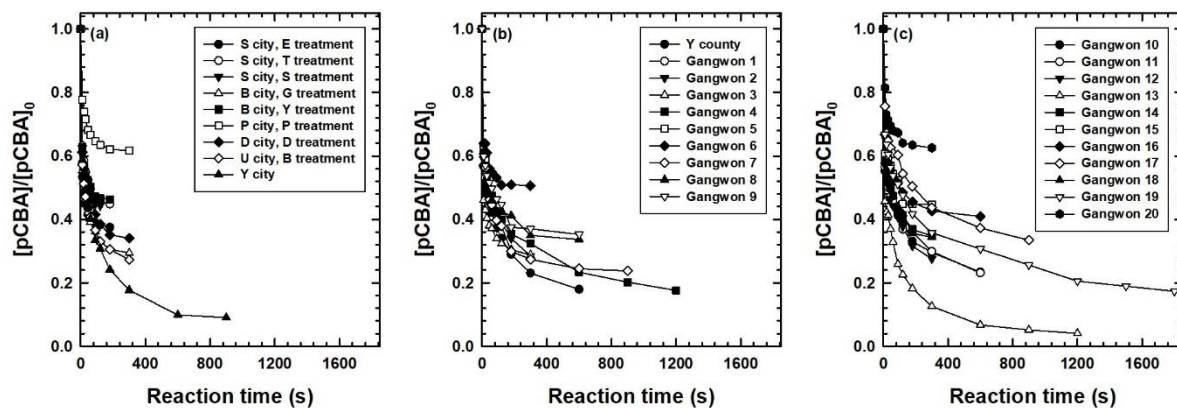

**Figure S5.** Time–concentration profiles of *p*CBA during the ozonation of wastewater effluents from WWTPs in (a) Seoul, and Gyeonggi and South Jeolla provinces, and (b, c) Gangwon province.

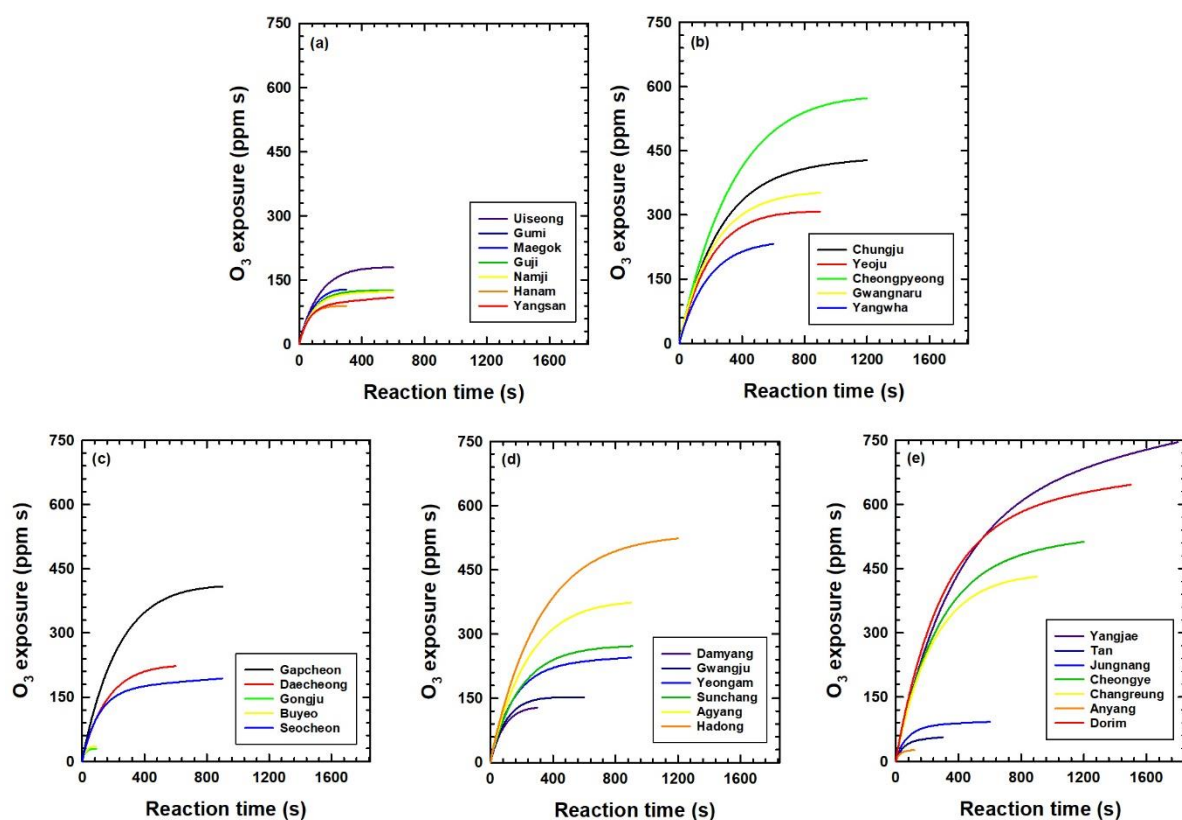

**Figure S6.** Time-dependent  $O_3$  exposure during the ozonation of natural waters, (a) Nakdong, (b) Han, (c) Geum, (d) Yeongsan and Sumjin Rivers, and (e) tributaries of the Han River.

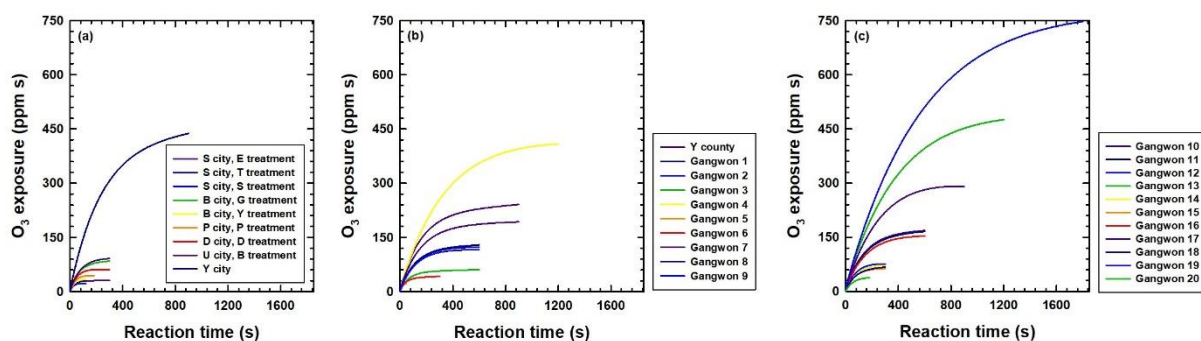

**Figure S7.** Time-dependent  $O_3$  exposure during the ozonation of wastewater effluents from WWTPs in (a) Seoul, and Gyeonggi and South Jeolla provinces, and (b, c) Gangwon province.



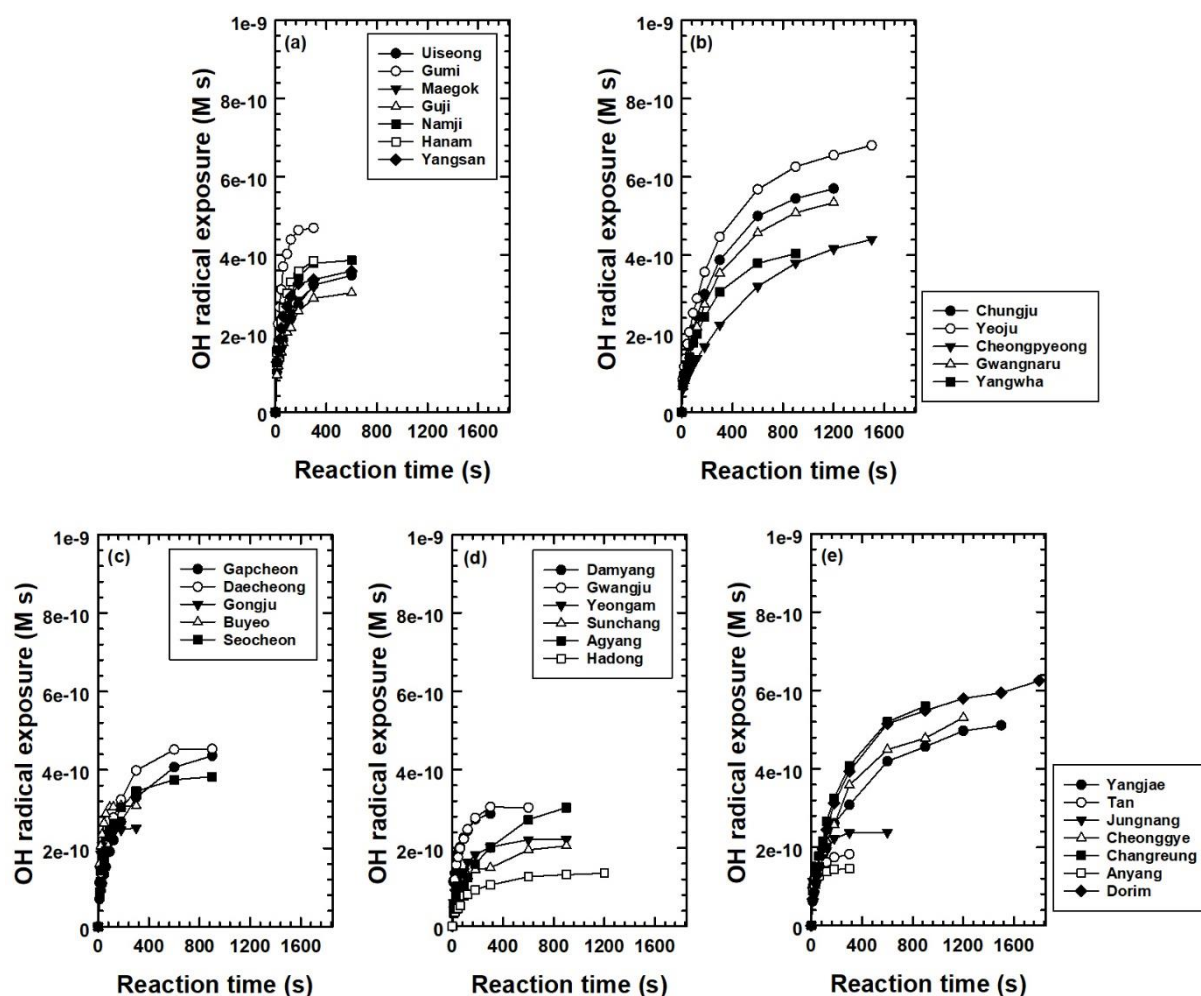

**Figure S8.** Time-dependent  $\bullet\text{OH}$  exposure during the ozonation of natural waters, (a) Nakdong, (b) Han, (c) Geum, (d) Yeongsan and Sumjin Rivers, and (e) tributaries of the Han River.

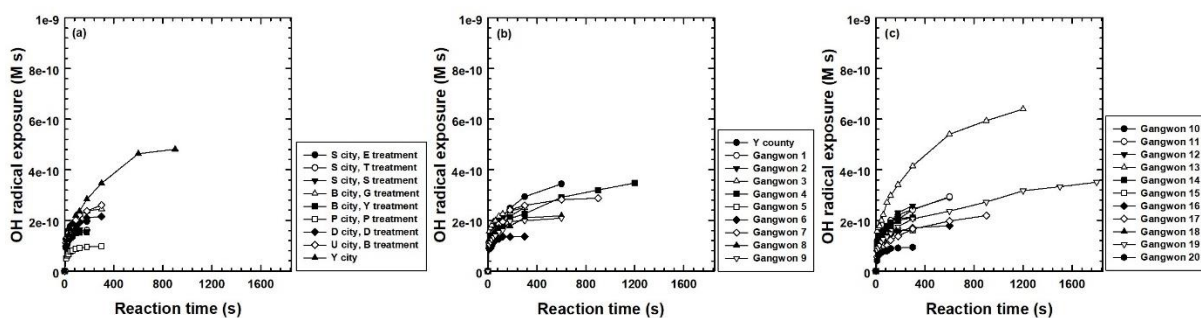

**Figure S9.** Time-dependent  $\bullet\text{OH}$  exposure during the ozonation of wastewater effluents from WWTPs in (a) Seoul, and Gyeonggi and South Jeolla provinces, and (b, c) Gangwon province.

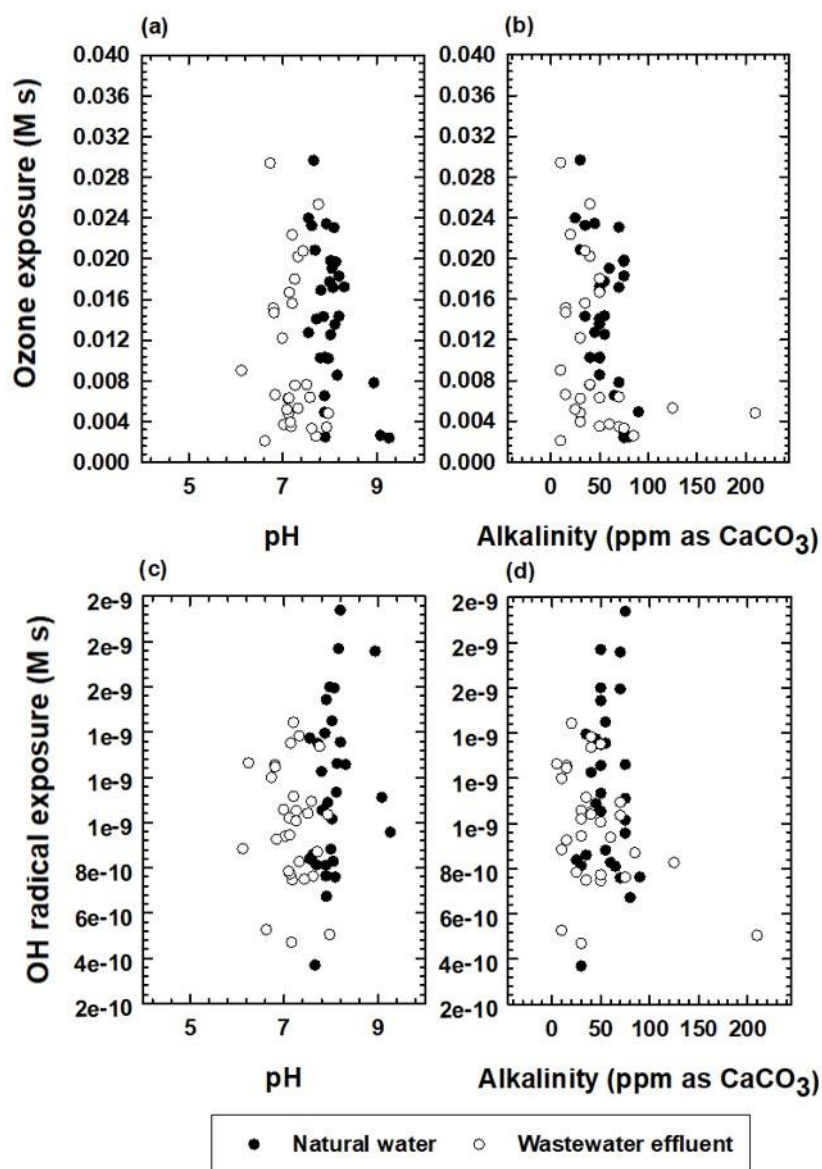

**Figure S10.** O<sub>3</sub> exposures as functions of (a) pH, and (b) alkalinity. •OH exposures as functions of (c) pH, and (d) alkalinity ([O<sub>3</sub>]<sub>0</sub> = 2.5 mg/L).

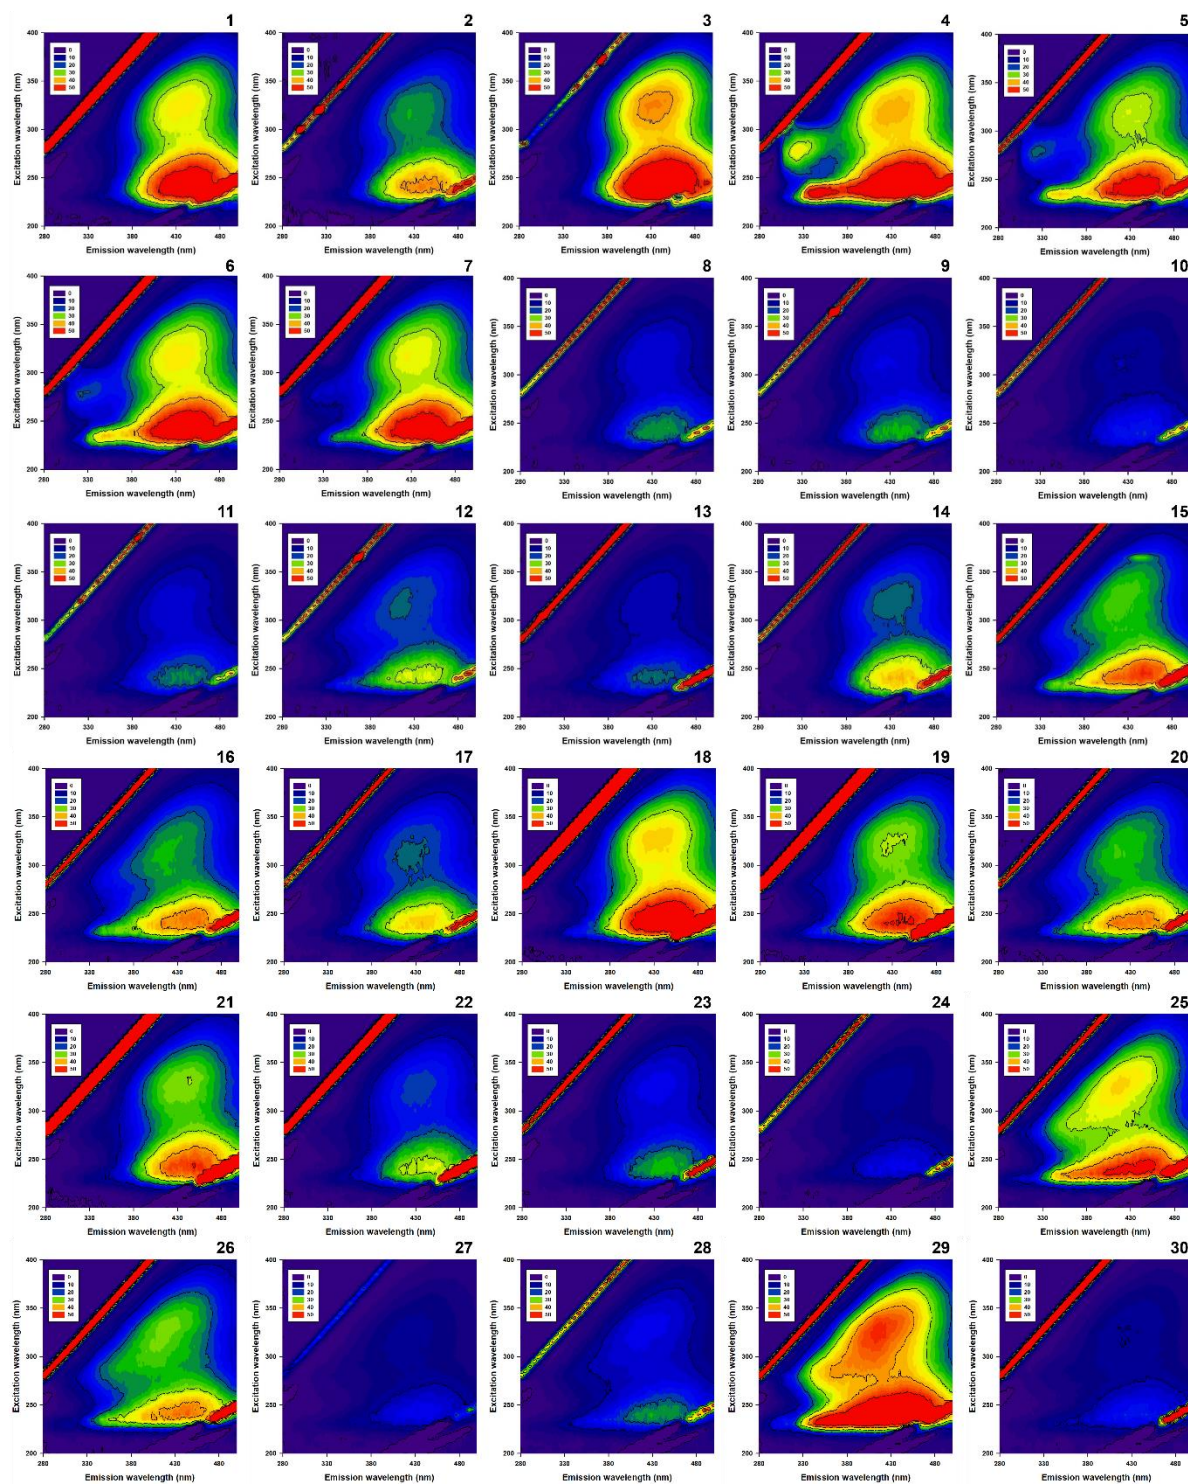

**Figure S11.** FEEM contour plots of natural waters. Numbering corresponds to sampling locations as designated in Table S2.



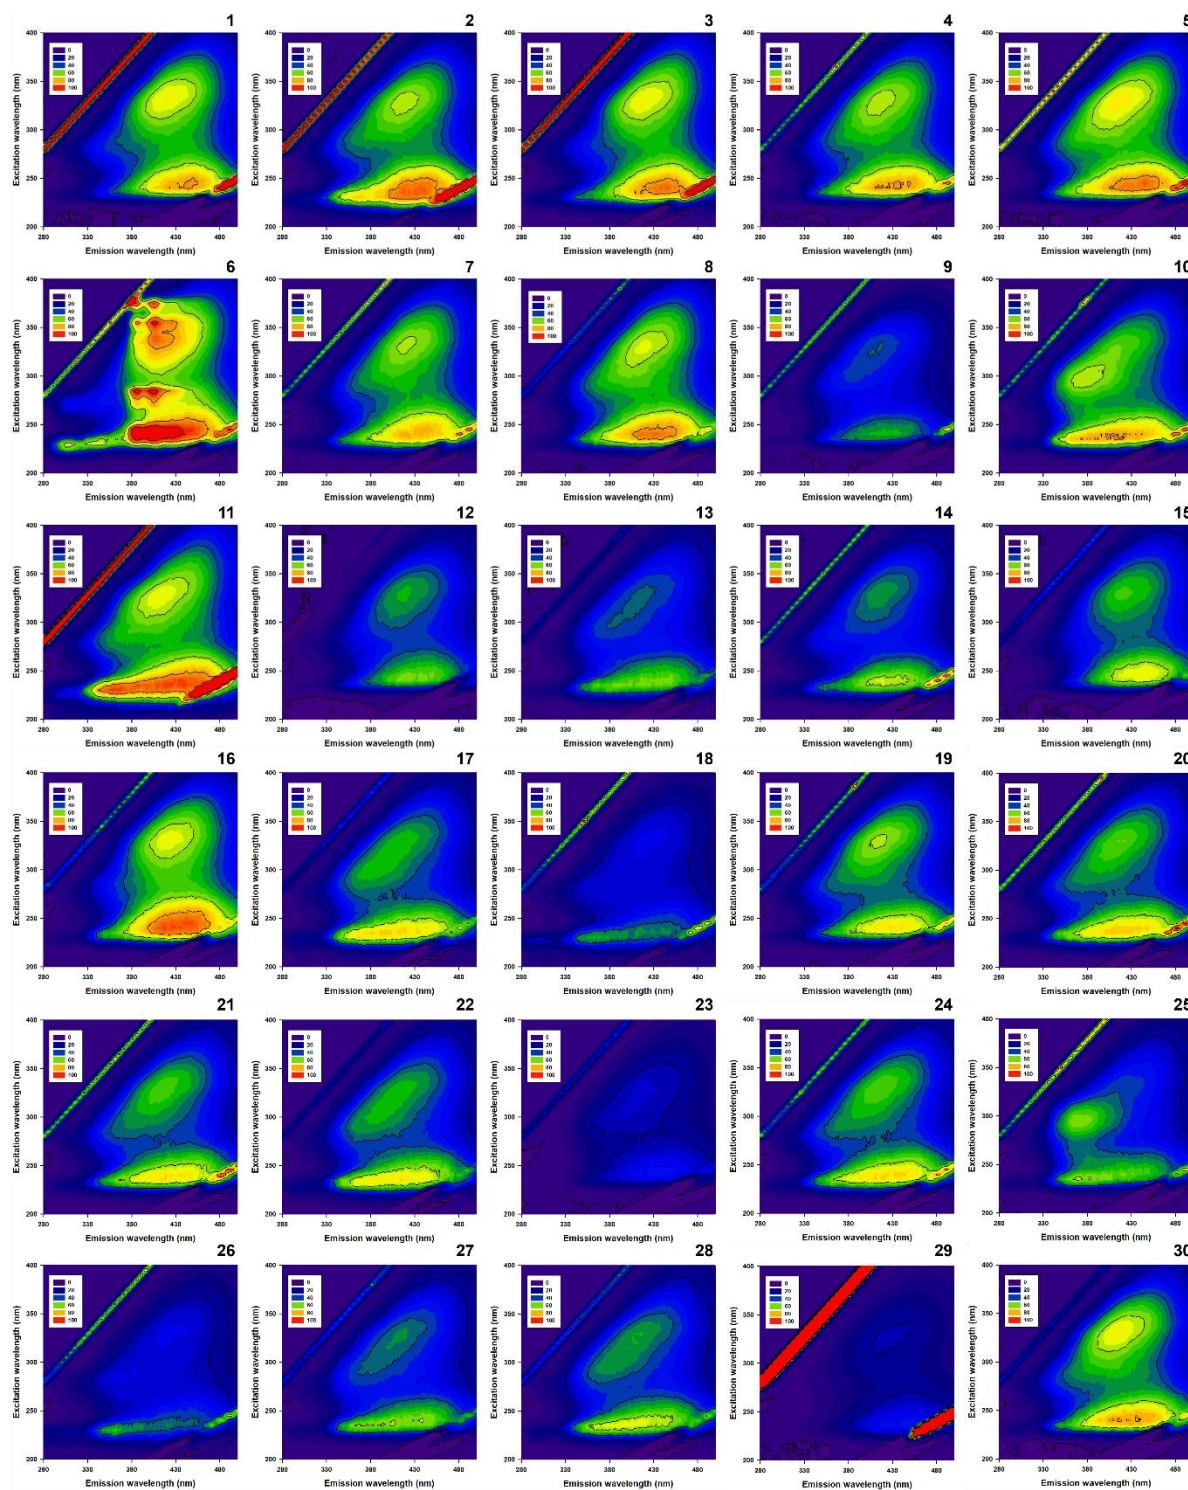

**Figure S12.** FEEM contour plots of wastewater effluents. Numbering corresponds to sampling locations as designated in Table S3.

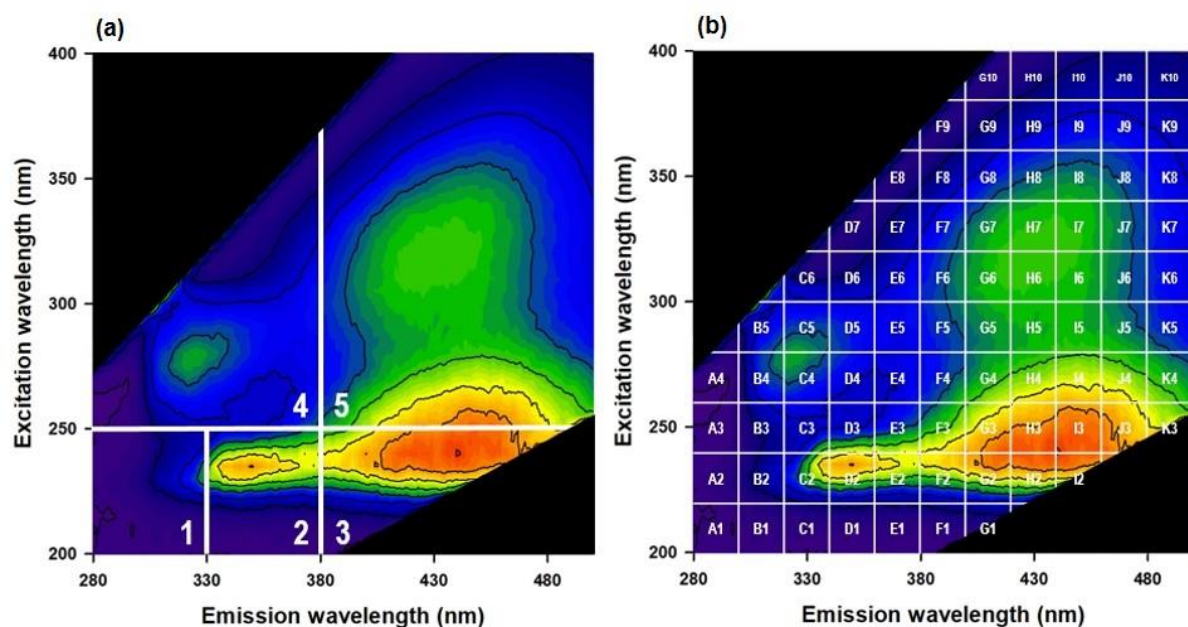

**Figure S13.** FRI division for (a) FEEM-LowRes, and (b) FEEM-HighRes models (the FEEM contour plot of Figure 3a was used as an example).

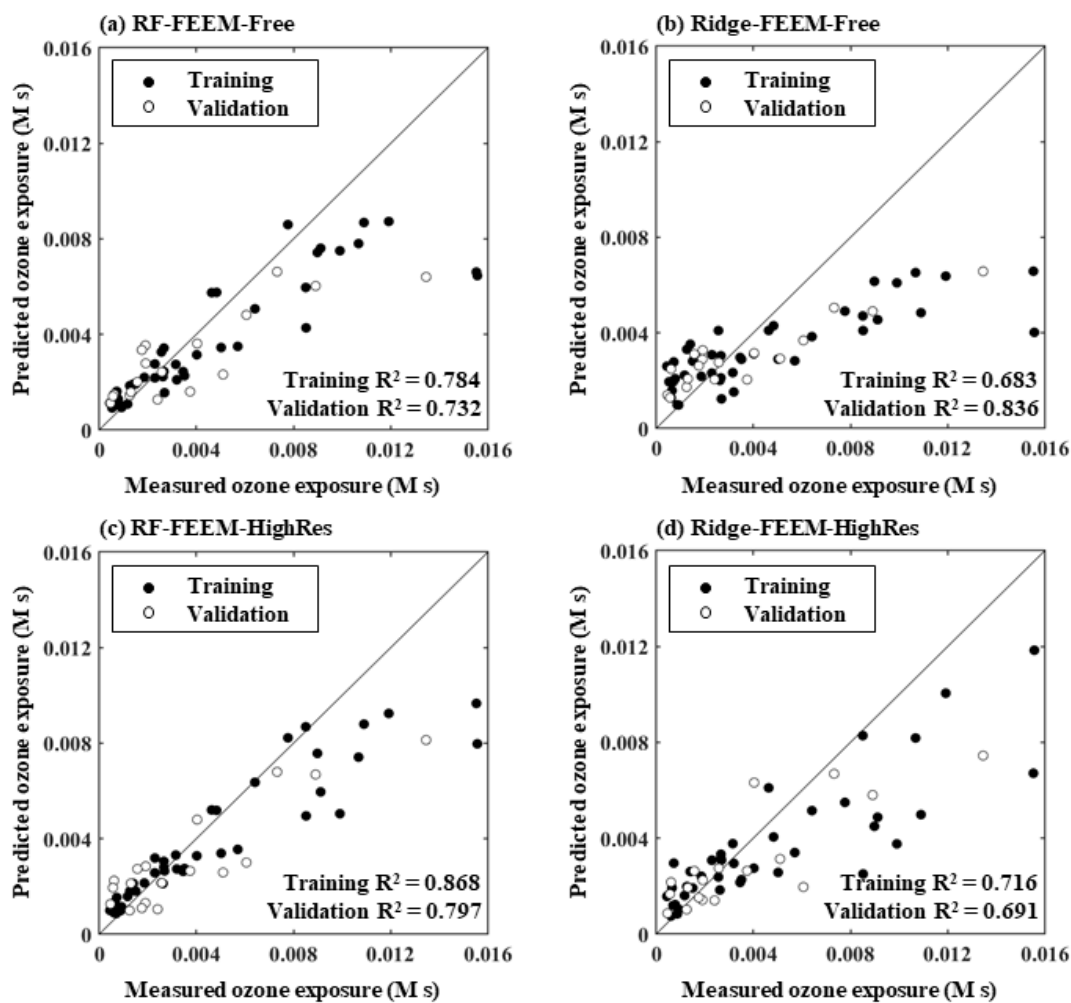

**Figure S14.** Plots of measured versus predicted O<sub>3</sub> exposures for RF and ridge regression models, (a) RF-FEEM-Free, (b) Ridge-FEEM-Free, (c) RF-FEEM-HighRes, and (d) Ridge-FEEM-HighRes ([O<sub>3</sub>]<sub>0</sub> = 2.5 mg/L).

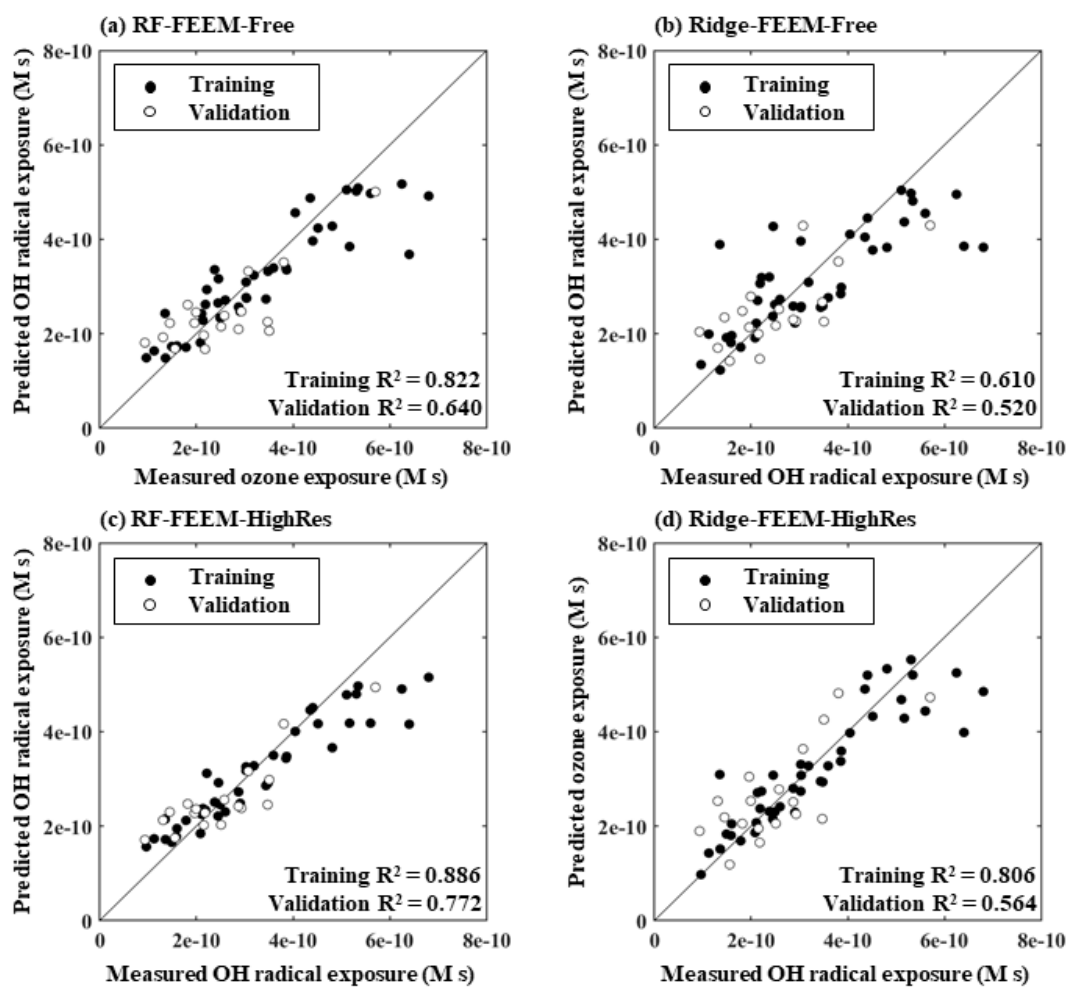

**Figure S15.** Plots of measured versus predicted  $\bullet\text{OH}$  exposures for RF and ridge regression model, (a) RF-FEEM-Free, (b) Ridge-FEEM-Free, (c) RF-FEEM-HighRes, and (d) Ridge-FEEM-HighRes ( $[\text{O}_3]_0 = 2.5 \text{ mg/L}$ ).

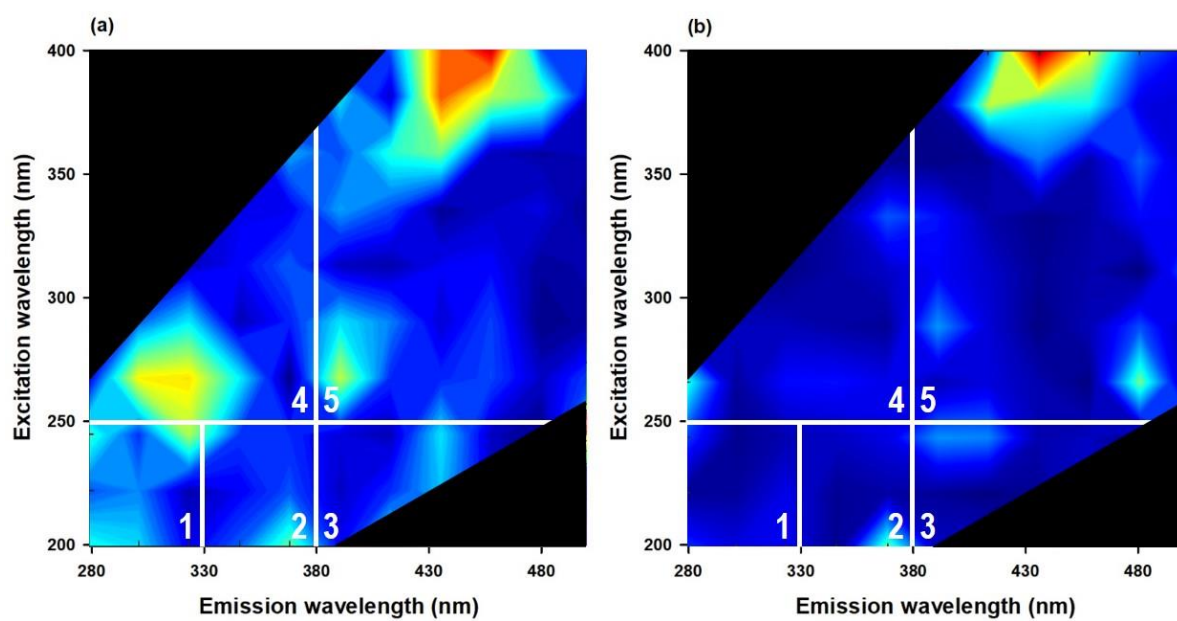

**Figure S16.** Variable importance (VI) for the prediction of (a)  $O_3$  exposure, and (b)  $\bullet OH$  exposure by the FEEM-HighRes model.



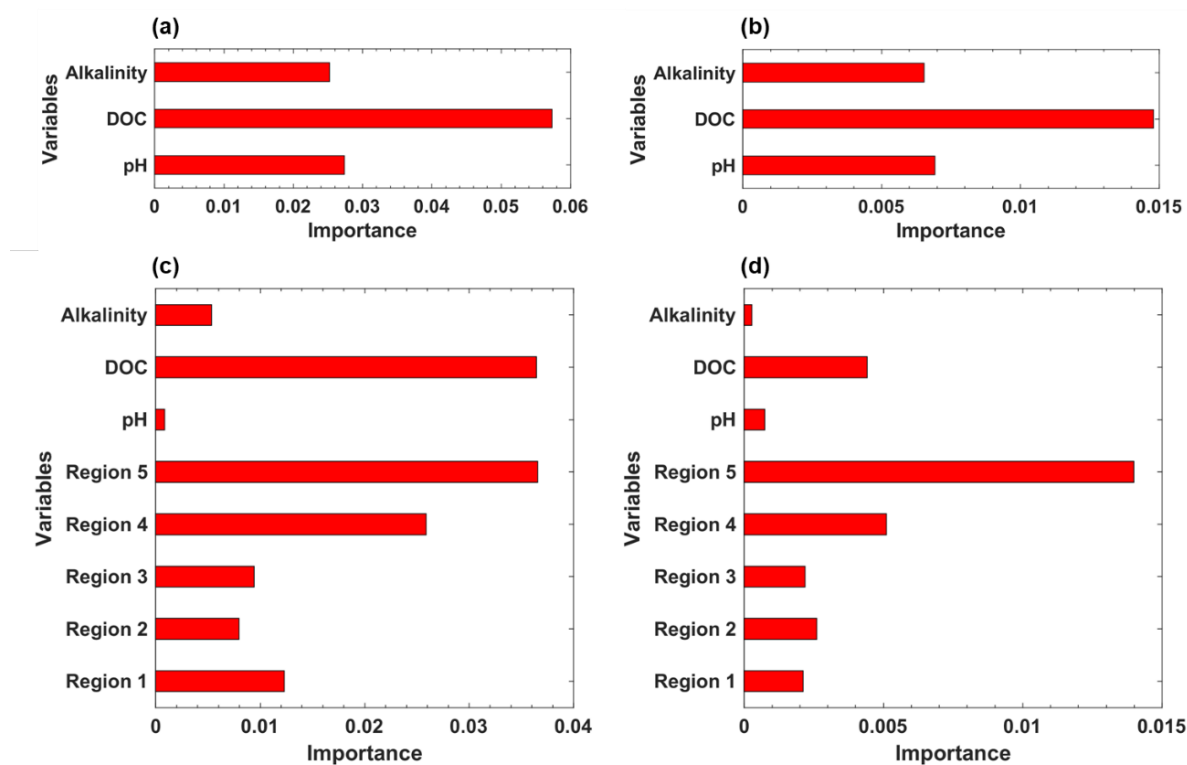

**Figure S17.** Variable importance (VI) for the prediction of (a) O<sub>3</sub> exposure and (b) •OH exposure by the FEEM-Free model, (c) O<sub>3</sub> exposure and (d) •OH exposure by the FEEM-HighRes model.

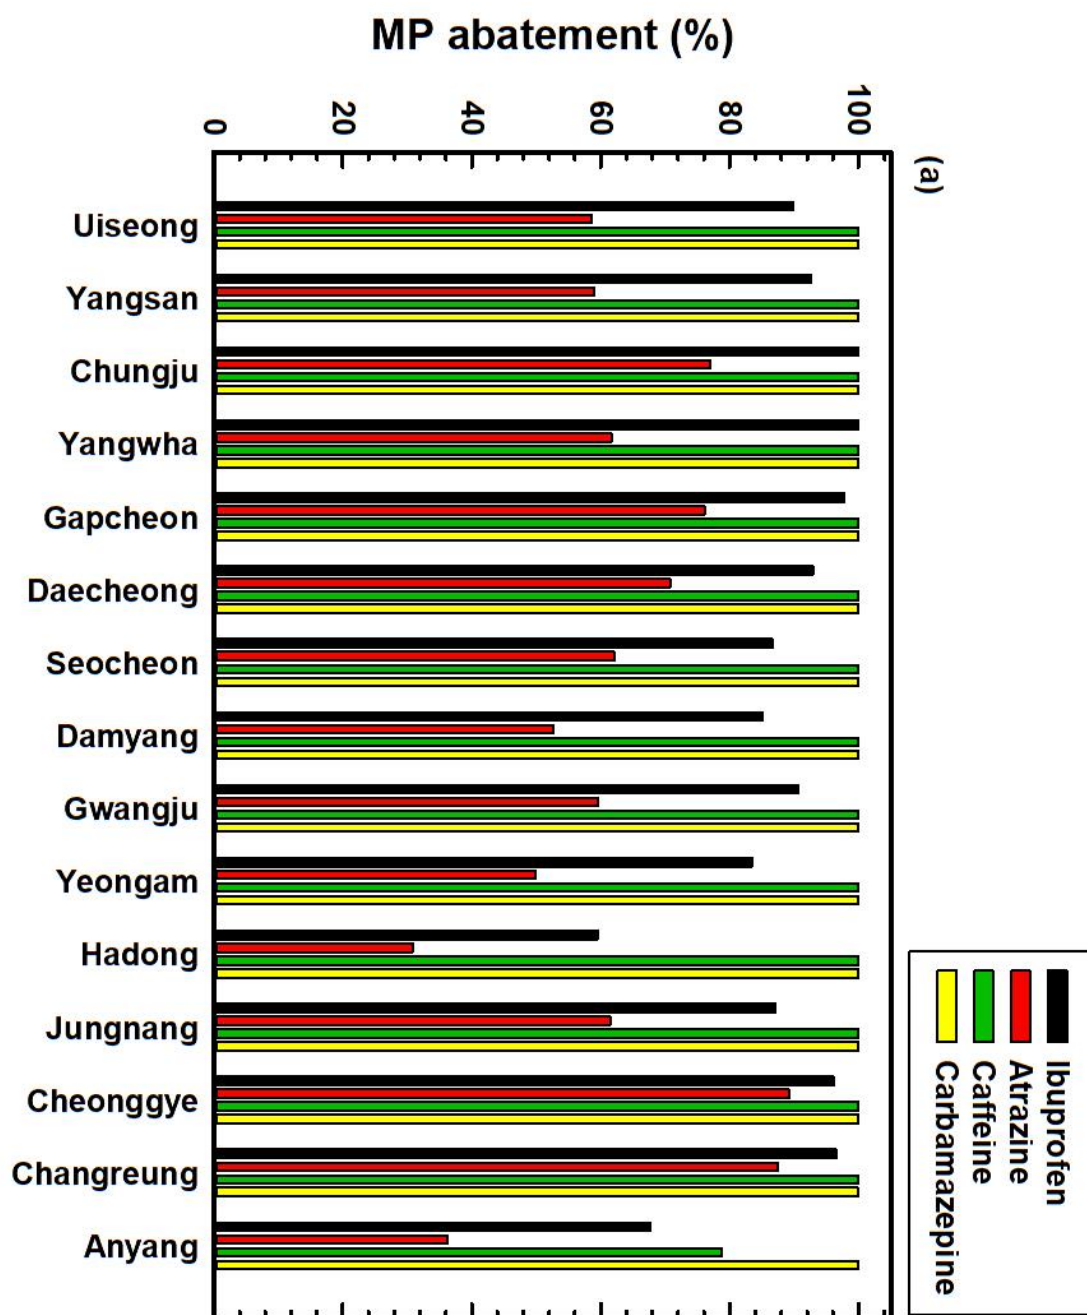

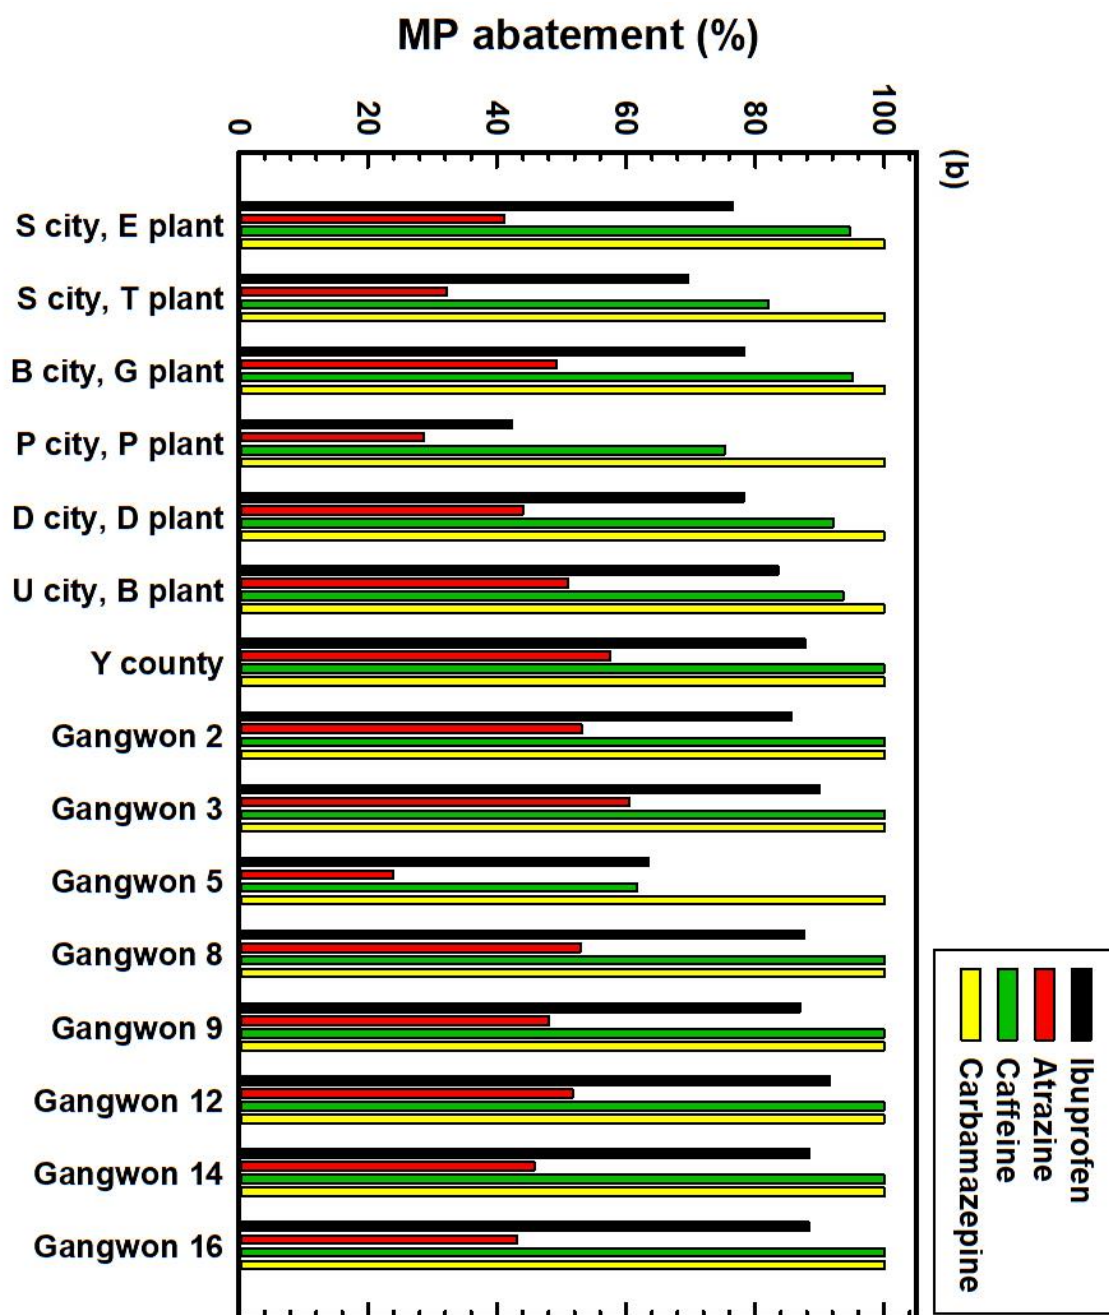

**Figure S18.** Percent removal of MPs in (a) natural water samples, and (b) wastewater effluent samples (15 natural water and wastewater effluent samples, each, i.e., total 30 samples).

## Supporting References

- S1. Acero, J. L.; Stemmler, K.; von Gunten, U. Degradation kinetics of atrazine and its degradation products with ozone and OH radicals: A predictive tool for drinking water treatment. *Environ. Sci. Technol.* **2000**, *34* (4), 591-597. DOI: 10.1021/es990724e.
- S2. Huber, M. M.; Canonica, S.; Park, G.-Y.; von Gunten, U. Oxidation of pharmaceuticals during ozonation and advanced oxidation processes. *Environ. Sci. Technol.* **2003**, *37* (5), 1016-1024. DOI: 10.1021/es025896h.
- S3. Broséus, R.; Vincent, S.; Aboulfadl, K.; Daneshvar, A.; Sauvé, S.; Barbeau, B.; Prévost, M. Ozone oxidation of pharmaceuticals, endocrine disruptors and pesticides during drinking water treatment. *Water Res.* **2009**, *43* (18), 4707-4717. DOI: 10.1016/j.watres.2009.07.031.
